# Supplementary material
Source: PubMed Central journal article supplement (PMC6644762)

Electronic Supplementary Information:

## **Two Low-cost and Efficient Hole-transport Materials for n-i-p Type Organic-inorganic Hybrid Perovskite Solar Cells**

Bin-Bin Cui,\*<sup>a</sup> Cheng Zhu,<sup>c</sup> Shuangshuang Yang,<sup>b</sup> Ying Han,<sup>ab</sup> Ning Yang,<sup>ab</sup> Liuzhu Zhang,<sup>c</sup> Yue Wang,<sup>c</sup> Yifei Jia,<sup>c</sup> Lin Zhao,<sup>c</sup> and Qi Chen\*<sup>c</sup>

<sup>a</sup>*Advanced Research Institute of Multidisciplinary Science, Beijing Institute of Technology, Beijing 100081, P. R. China*

*E-mail: [cui-chem@bit.edu.cn](mailto:cui-chem@bit.edu.cn)*

<sup>b</sup>*School of Chemistry and Chemical Engineering, Beijing Institute of Technology, Beijing 102488, P. R. China*

<sup>c</sup>*Department of Materials Science and Engineering, Beijing Institute of Technology, Beijing 100081, P. R. China*

*E-mail: [qic@bit.edu.cn](mailto:qic@bit.edu.cn)*

### **Contents**

- 1. Evaluation basis of cost of HTMs**
- 2. *J*-*V* curves of devices under opposite scan direction.**
- 3. NMR and MS Data**

## 1. Evaluation basis of cost of HTMs

**Table S1. Evaluation basis of cost of Bp-OMe.**

| Reagent                                                                         | Amount (g) | Amount (mL) | Price (\$/g or \$/mL) | Total price (\$) |
|---------------------------------------------------------------------------------|------------|-------------|-----------------------|------------------|
| 3,3',5,5'-Tetrabromobiphenyl                                                    | 0.24       |             | 37.500                | 9.00             |
| 4-(4,4,5,5-tetramethyl-1,3,2-dioxaborolan-2-yl)-N,N-bis(4-methoxyphenyl)aniline | 1.08       |             | 20.635                | 22.29            |
| THF                                                                             |            | 20          | 0.007                 | 0.14             |
| Pd(PPh <sub>3</sub> ) <sub>4</sub>                                              | 0.65       |             | 1.776                 | 1.15             |
| K <sub>2</sub> CO <sub>3</sub>                                                  | 0.54       |             | 0.020                 | 0.01             |
| methanol                                                                        |            | 200         | 0.016                 | 3.2              |
| CH <sub>2</sub> Cl <sub>2</sub>                                                 |            | 200         | 0.003                 | 0.6              |
| <b>Total cost</b>                                                               |            |             | 36.39                 |                  |
| <b>Amount Bp-OMe (g)</b>                                                        |            |             | 0.58                  |                  |
| <b>COST for Bp-OMe (\$/g)</b>                                                   |            |             | 62.7                  |                  |

**Table S2. Evaluation basis of cost of Py-OMe.**

| Reagent                                                                         | Amount (g) | Amount (mL) | Price (\$/g or \$/mL) | Total price (\$) |
|---------------------------------------------------------------------------------|------------|-------------|-----------------------|------------------|
| 1,3,6,8-Tetrabromopyrene                                                        | 0.26       |             | 16.068                | 4.18             |
| 4-(4,4,5,5-tetramethyl-1,3,2-dioxaborolan-2-yl)-N,N-bis(4-methoxyphenyl)aniline | 1.08       |             | 20.635                | 22.29            |
| THF                                                                             |            | 20          | 0.007                 | 0.14             |
| Pd(PPh <sub>3</sub> ) <sub>4</sub>                                              | 0.65       |             | 1.776                 | 1.15             |
| K <sub>2</sub> CO <sub>3</sub>                                                  | 0.54       |             | 0.020                 | 0.01             |
| methanol                                                                        |            | 200         | 0.016                 | 3.2              |
| CH <sub>2</sub> Cl <sub>2</sub>                                                 |            | 200         | 0.003                 | 0.6              |
| <b>Total cost</b>                                                               |            |             | 31.57                 |                  |
| <b>Amount Py-OMe (g)</b>                                                        |            |             | 0.63                  |                  |
| <b>COST for Py-OMe (\$/g)</b>                                                   |            |             | 50.1                  |                  |

2.

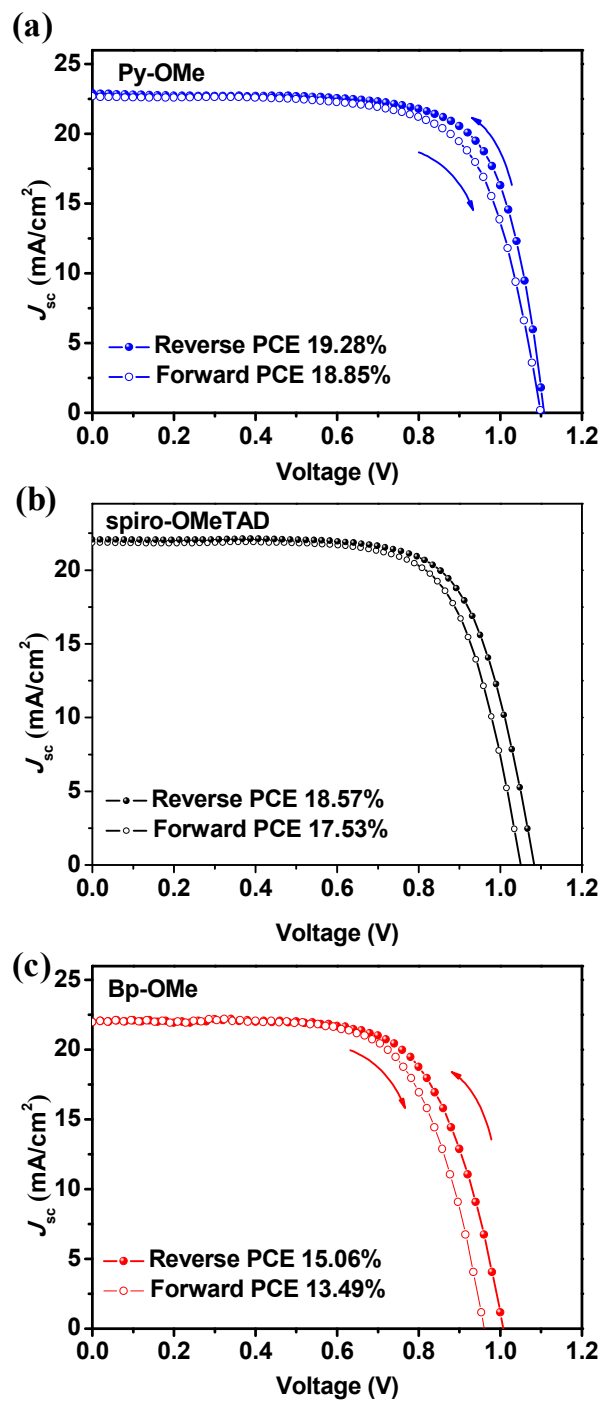

Figure S1.  $J$ - $V$  curves of devices based on (a) Py-OMe, (b) spiro-OMe and (c) Bp-OMe under opposite scan direction.

3. Figure S2.  $^1\text{H}$  NMR spectrum of **Bp-OMe** in  $\text{DMSO-d}^6$ :

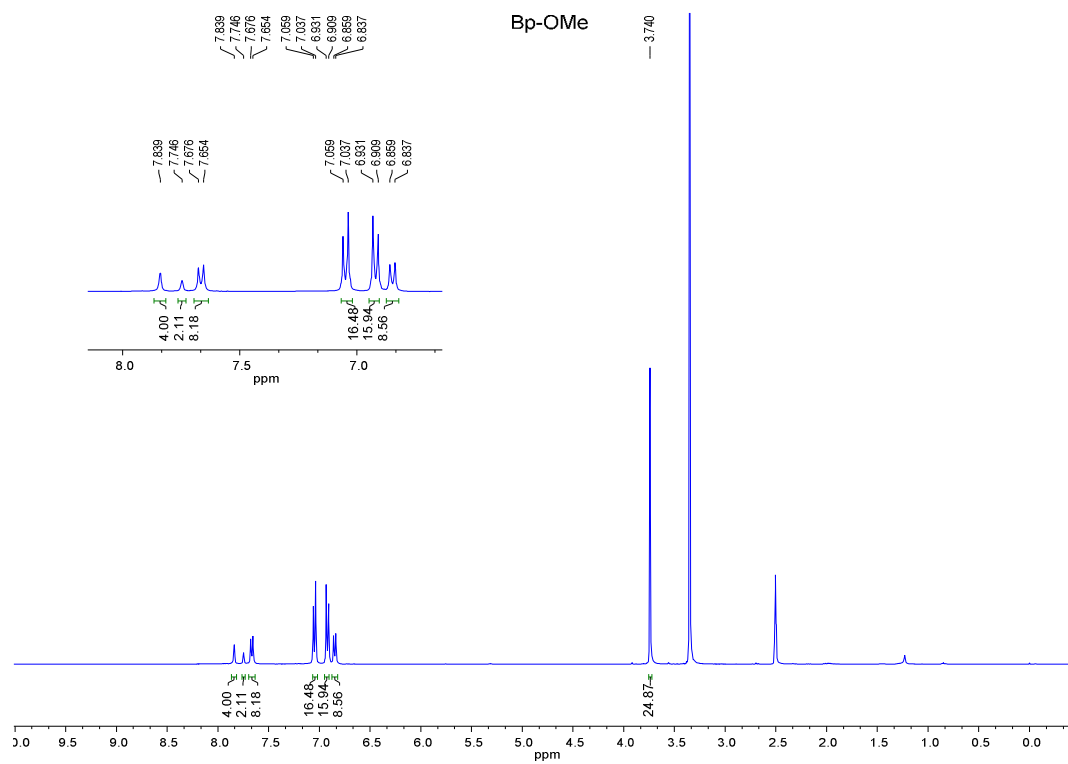

Figure S3.  $^{13}\text{C}$  NMR spectrum of **Bp-OMe** in  $\text{DMSO-d}^6$ :

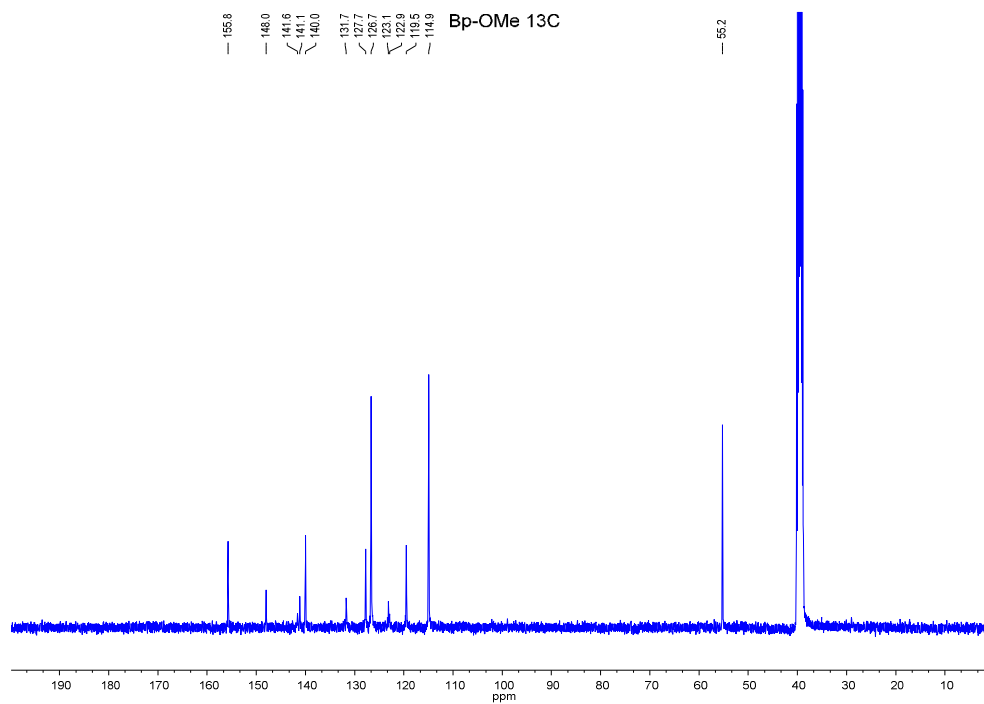

Figure S4. HR-MALDI mass spectra of **Bp-OMe**:

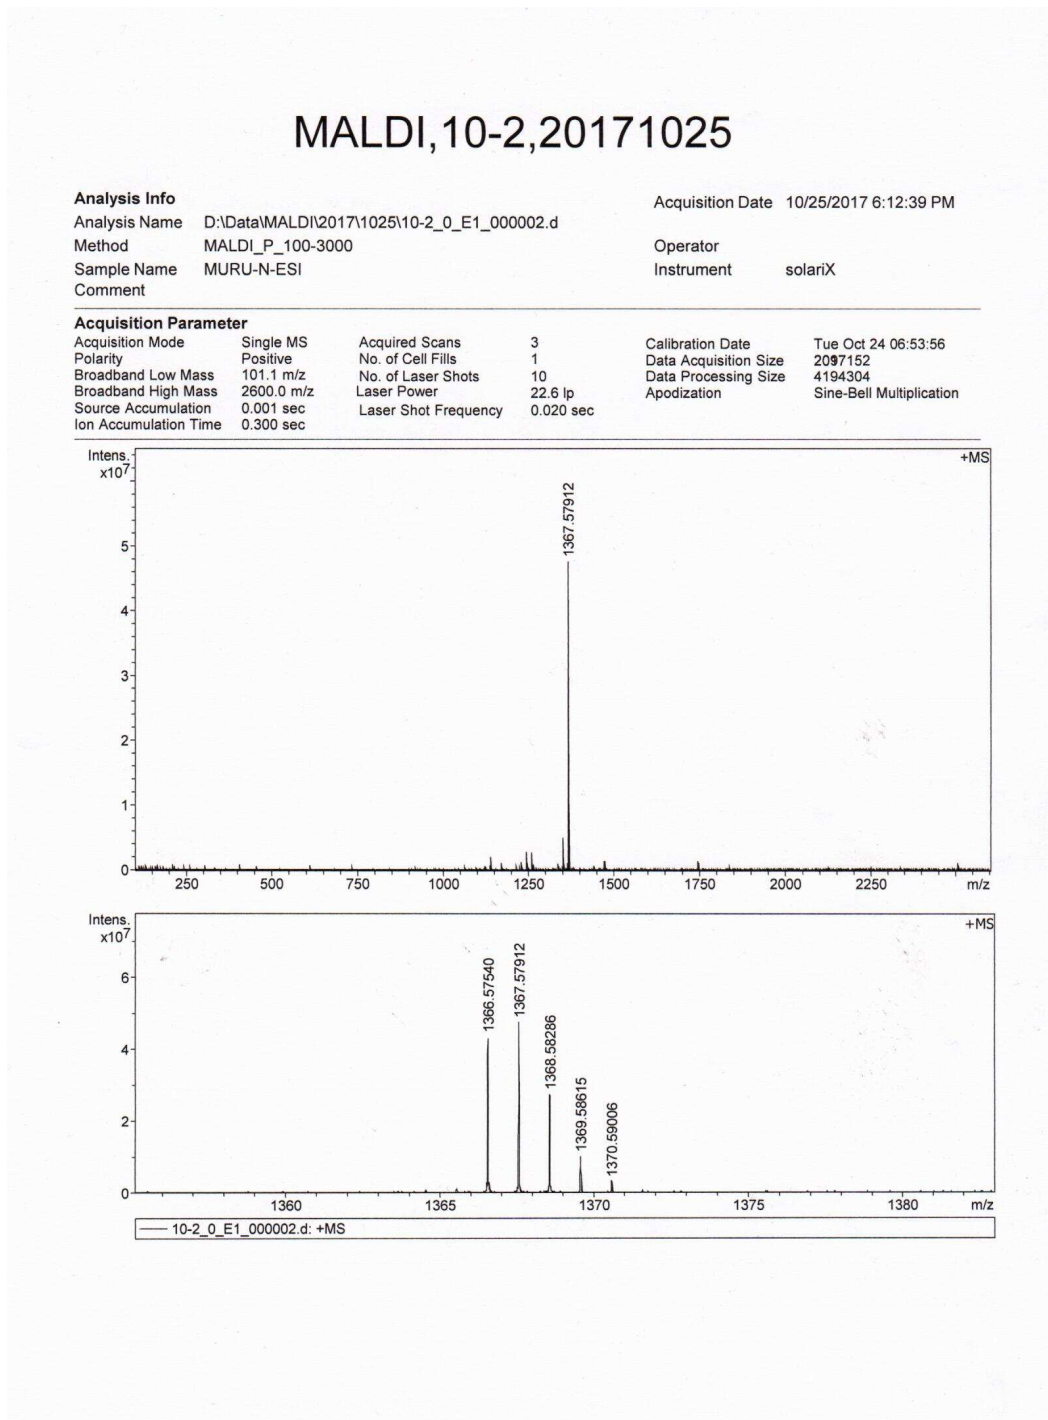

Figure S5.  $^1\text{H}$  NMR spectrum of **Py-OMe** in  $\text{DMSO-d}^6$ :

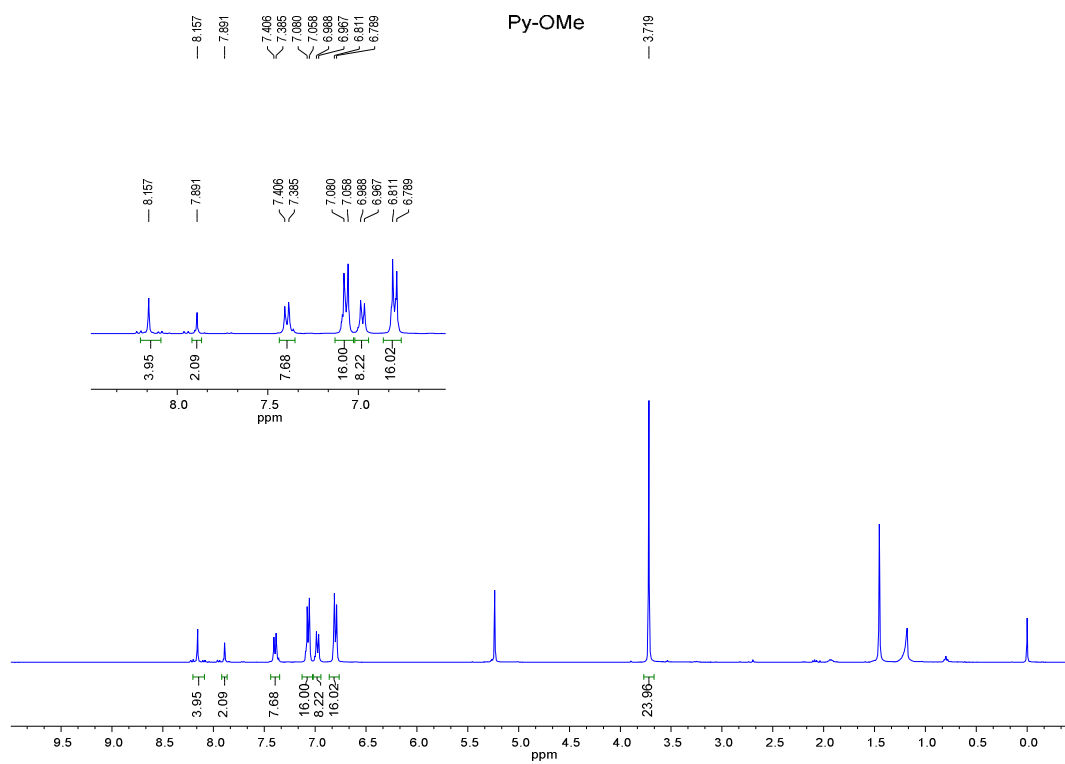

Figure S6.  $^{13}\text{C}$  NMR spectrum of **Py-OMe** in  $\text{DMSO-d}^6$ :

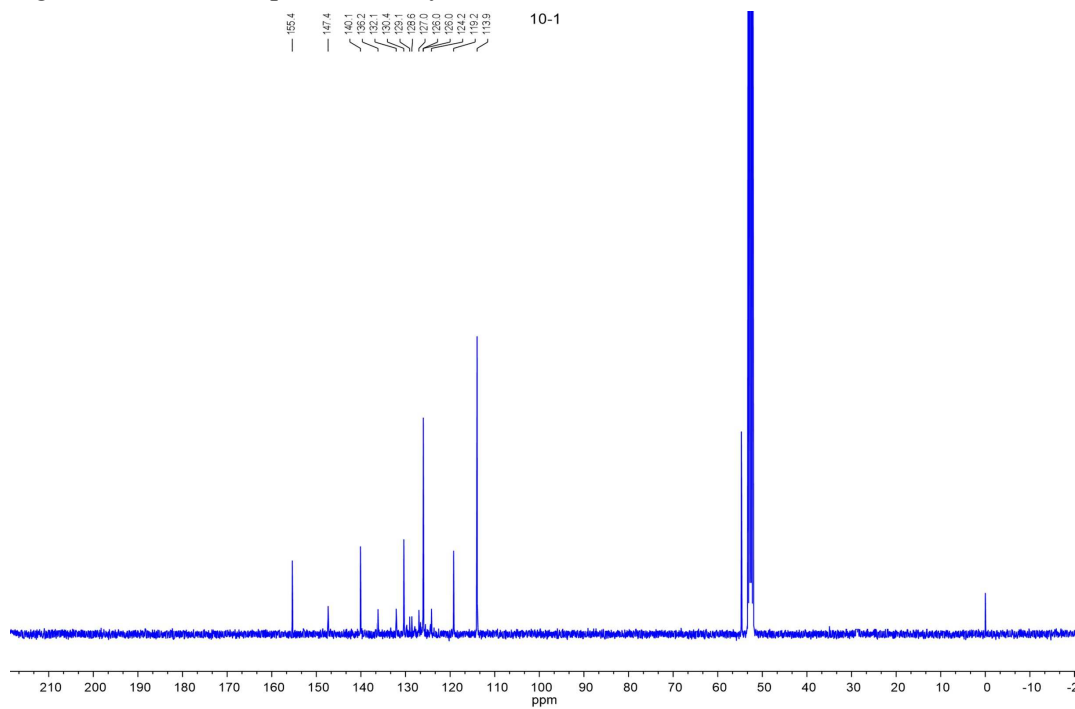

Figure S7. HR-MALDI mass spectra of **Py-OMe**:

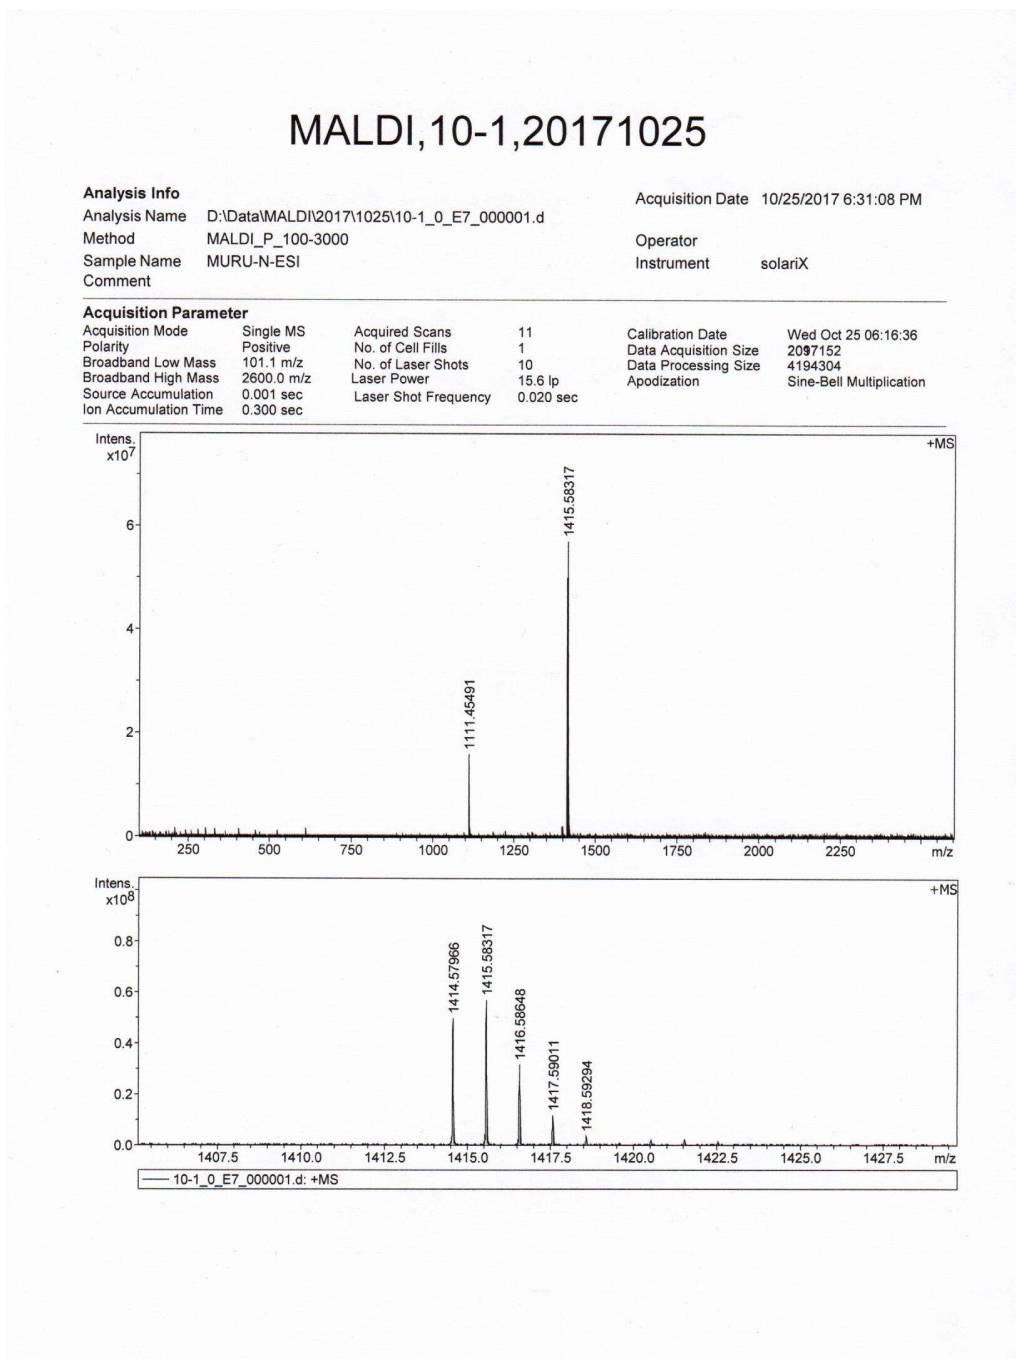

Supplement: ao8b01817_si_001.pdf [file ao8b01817_si_001.pdf]
